# Supplementary material
Source: MDPI journal article supplement (https://www.mdpi.com/2073-4433/13/7/1018)
Supplement: s1 [file s1]

---

## Supplementary Materials:

# PM<sub>2.5</sub> Pollution Levels and Chemical Components at Teahouses Along the Poon Hill Trek in Nepal

James D. Johnston<sup>1,\*</sup>, John D. Beard<sup>1</sup>, M. Lelinneth B. Novilla<sup>1</sup>, Frank X. Weber<sup>2</sup>, and Ryan T. Chartier<sup>2</sup>

<sup>1</sup> Department of Public Health, Brigham Young University, Provo, UT 84602, USA; john\_beard@byu.edu (J.D.B.); len\_novilla@byu.edu (M.L.B.N.)

<sup>2</sup> RTI International, Research Triangle Park, NC 27709, USA; fxw@rti.org (F.X.W.); rchartier@rti.org (R.T.C.)

\* Correspondence: james\_johnston@byu.edu; Tel.: +1-801-422-4226

**Table S1.** LDLs and summary statistics for the mean (of the sampling period) of samples inside or outside teahouses in villages along the Poon Hill circuit trek, Nepal, May 2019.

| Variable                                                       | LDL Mass ( $\mu\text{g}$ ) | LDL Concentration Range | Below LDL, n (%) | Above LDL, n (%) |
|----------------------------------------------------------------|----------------------------|-------------------------|------------------|------------------|
| Sampling time, minutes                                         | NA                         | NA                      | a                | a                |
| PM <sub>2.5</sub> , $\mu\text{g}/\text{m}^3$                   | 0.1                        | 0.2, 0.3                | a                | a                |
| PM <sub>2.5</sub> aluminum (Al), $\mu\text{g}/\text{m}^3$      | 0.012                      | 0.029, 0.031            | a                | a                |
| PM <sub>2.5</sub> antimony (Sb), $\mu\text{g}/\text{m}^3$      | 0.24                       | 0.57, 0.59              | 5 (100)          | 0 (0)            |
| PM <sub>2.5</sub> arsenic (As), $\mu\text{g}/\text{m}^3$       | 0.0024                     | 0.0057, 0.0059          | 5 (100)          | 0 (0)            |
| PM <sub>2.5</sub> barium (Ba), $\mu\text{g}/\text{m}^3$        | 0.0047                     | 0.011, 0.012            | a                | a                |
| PM <sub>2.5</sub> black carbon (BC), $\mu\text{g}/\text{m}^3$  | 0.5                        | 1.2, 1.3                | 5 (100)          | 0 (0)            |
| PM <sub>2.5</sub> bromine (Br), $\mu\text{g}/\text{m}^3$       | 0.0021                     | 0.0050, 0.0052          | a                | a                |
| PM <sub>2.5</sub> brown carbon (BrC), $\mu\text{g}/\text{m}^3$ | 0.5                        | 1.2, 1.3                | a                | a                |
| PM <sub>2.5</sub> cadmium (Cd), $\mu\text{g}/\text{m}^3$       | 0.082                      | 0.20, 0.21              | 5 (100)          | 0 (0)            |
| PM <sub>2.5</sub> caesium (Cs), $\mu\text{g}/\text{m}^3$       | 0.0024                     | 0.0057, 0.0059          | a                | a                |
| PM <sub>2.5</sub> calcium (Ca), $\mu\text{g}/\text{m}^3$       | 0.0022                     | 0.0054, 0.0057          | a                | a                |
| PM <sub>2.5</sub> cerium (Ce), $\mu\text{g}/\text{m}^3$        | 0.0024                     | 0.0057, 0.0059          | 5 (100)          | 0 (0)            |
| PM <sub>2.5</sub> chlorine (Cl), $\mu\text{g}/\text{m}^3$      | 0.0019                     | 0.0046, 0.0048          | a                | a                |
| PM <sub>2.5</sub> chromium (Cr), $\mu\text{g}/\text{m}^3$      | 0.0013                     | 0.0031, 0.0033          | a                | a                |
| PM <sub>2.5</sub> cobalt (Co), $\mu\text{g}/\text{m}^3$        | 0.00096                    | 0.0023, 0.0024          | 5 (100)          | 0 (0)            |
| PM <sub>2.5</sub> copper (Cu), $\mu\text{g}/\text{m}^3$        | 0.0016                     | 0.0038, 0.0039          | a                | a                |
| PM <sub>2.5</sub> indium (In), $\mu\text{g}/\text{m}^3$        | 0.12                       | 0.29, 0.31              | 5 (100)          | 0 (0)            |
| PM <sub>2.5</sub> iron (Fe), $\mu\text{g}/\text{m}^3$          | 0.0016                     | 0.0040, 0.0042          | a                | a                |
| PM <sub>2.5</sub> lead (Pb), $\mu\text{g}/\text{m}^3$          | 0.0049                     | 0.012, 0.012            | a                | a                |
| PM <sub>2.5</sub> magnesium (Mg), $\mu\text{g}/\text{m}^3$     | 0.0050                     | 0.012, 0.013            | a                | a                |
| PM <sub>2.5</sub> manganese (Mn), $\mu\text{g}/\text{m}^3$     | 0.0018                     | 0.0042, 0.0044          | a                | a                |
| PM <sub>2.5</sub> molybdenum (Mo), $\mu\text{g}/\text{m}^3$    | 0.012                      | 0.028, 0.030            | 5 (100)          | 0 (0)            |
| PM <sub>2.5</sub> nickel (Ni), $\mu\text{g}/\text{m}^3$        | 0.0010                     | 0.0024, 0.0025          | a                | a                |
| PM <sub>2.5</sub> phosphorus (P), $\mu\text{g}/\text{m}^3$     | 0.0024                     | 0.0059, 0.0062          | a                | a                |
| PM <sub>2.5</sub> potassium (K), $\mu\text{g}/\text{m}^3$      | 0.0019                     | 0.0047, 0.0049          | a                | a                |
| PM <sub>2.5</sub> rubidium (Rb), $\mu\text{g}/\text{m}^3$      | 0.0023                     | 0.0057, 0.0059          | a                | a                |
| PM <sub>2.5</sub> selenium (Se), $\mu\text{g}/\text{m}^3$      | 0.0022                     | 0.0054, 0.0057          | 5 (100)          | 0 (0)            |
| PM <sub>2.5</sub> silicon (Si), $\mu\text{g}/\text{m}^3$       | 0.0064                     | 0.015, 0.016            | a                | a                |
| PM <sub>2.5</sub> silver (Ag), $\mu\text{g}/\text{m}^3$        | 0.055                      | 0.13, 0.14              | 5 (100)          | 0 (0)            |
| PM <sub>2.5</sub> sodium (Na), $\mu\text{g}/\text{m}^3$        | 0.010                      | 0.025, 0.026            | a                | a                |

| Variable                                                   | LDL Mass ( $\mu\text{g}$ ) | LDL Concentration Range | Below LDL, n (%) | Above LDL, n (%) |
|------------------------------------------------------------|----------------------------|-------------------------|------------------|------------------|
| PM <sub>2.5</sub> strontium (Sr), $\mu\text{g}/\text{m}^3$ | 0.0030                     | 0.0072, 0.0075          | 5 (100)          | 0 (0)            |
| PM <sub>2.5</sub> sulfur (S), $\mu\text{g}/\text{m}^3$     | 0.0026                     | 0.0064, 0.0067          | a                | a                |
| PM <sub>2.5</sub> tin (Sn), $\mu\text{g}/\text{m}^3$       | 0.18                       | 0.43, 0.45              | 5 (100)          | 0 (0)            |
| PM <sub>2.5</sub> titanium (Ti), $\mu\text{g}/\text{m}^3$  | 0.00085                    | 0.0020, 0.0021          | a                | a                |
| PM <sub>2.5</sub> vanadium (V), $\mu\text{g}/\text{m}^3$   | 0.0011                     | 0.0026, 0.0027          | a                | a                |
| PM <sub>2.5</sub> zinc (Zn), $\mu\text{g}/\text{m}^3$      | 0.0015                     | 0.0037, 0.0039          | a                | a                |
| Relative humidity, %                                       | NA                         | NA                      | a                | a                |
| Temperature, °C                                            | NA                         | NA                      | a                | a                |

Abbreviations: LDL, lower detection limit; NA, not applicable; PM<sub>2.5</sub>, particulate matter with an aerodynamic diameter less than 2.5  $\mu\text{m}$ .

<sup>a</sup> Summary statistics are included in Table 1.
